# Supplementary material
Source: Springer Nature journal article supplement (https://www.springermedizin.de/resource/supplementary/12889_2011_4272_MOESM2_ESM.pdf/9492258)
Supplement: MOESM2 [file 9492258]

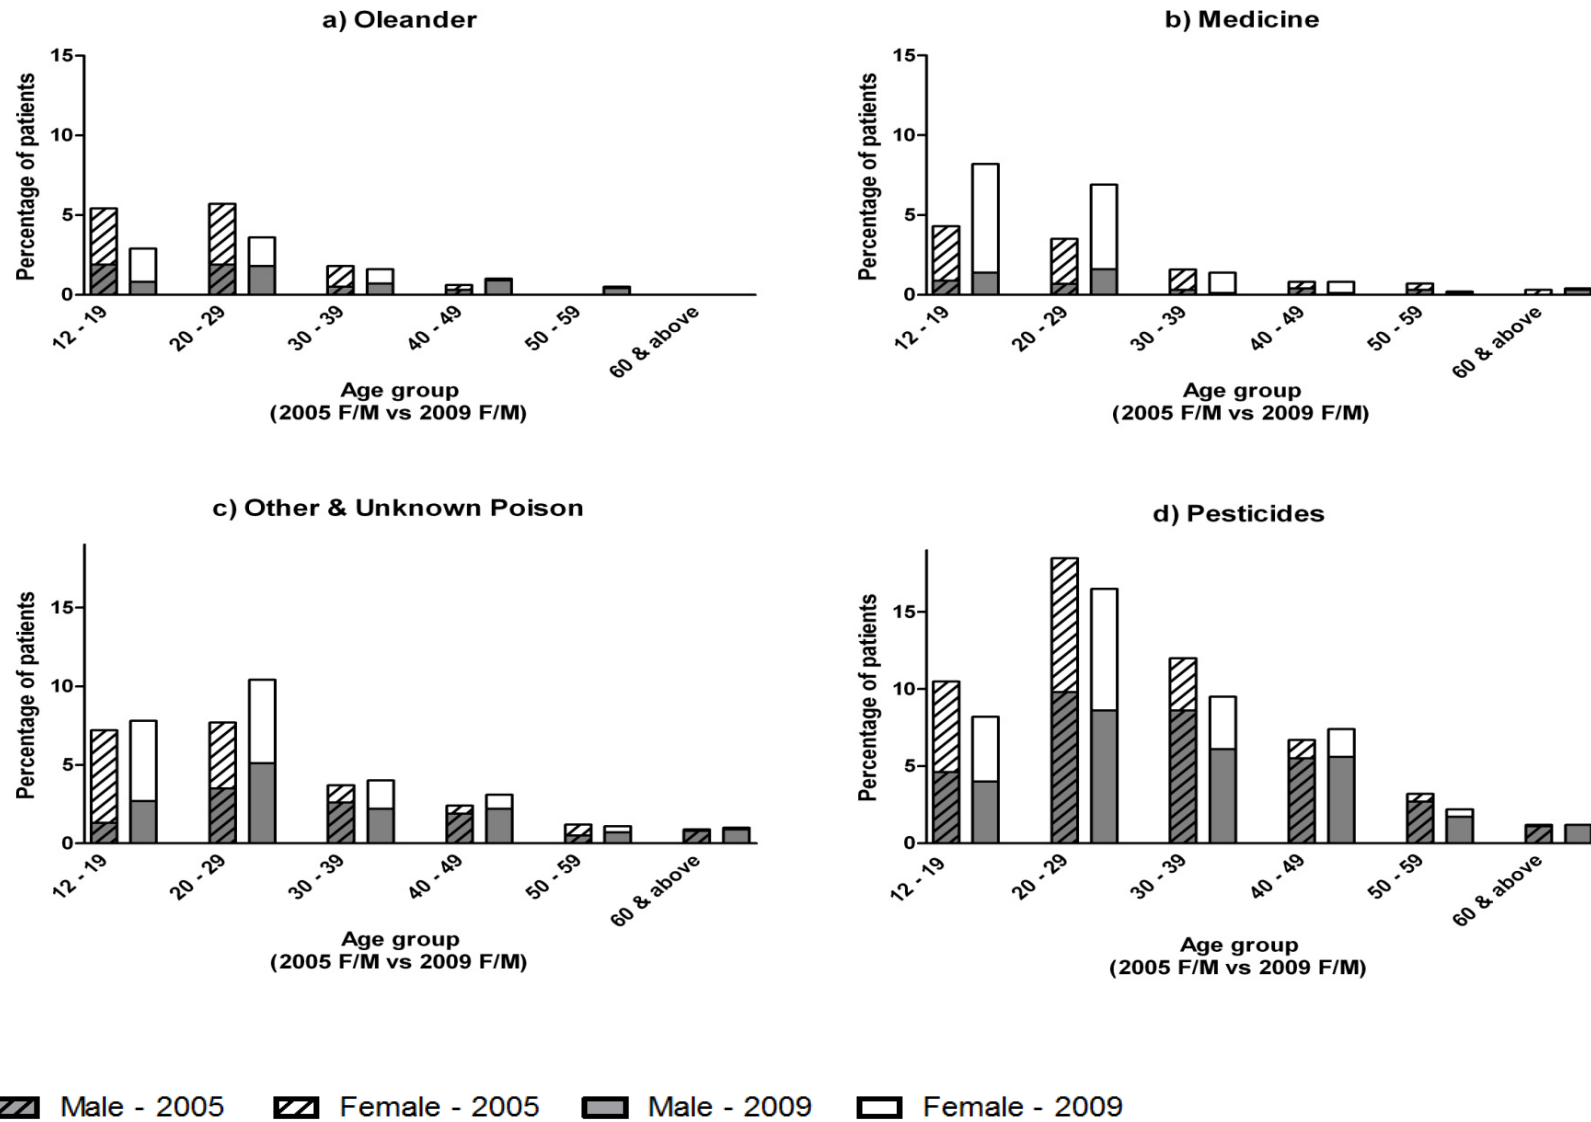

\*The y axis of a) and b) has a different range (0 to 15%) to c) and d) (0 to 20%) for easy comparison

**Figure 1:**

Comparison of the percentage of poisoning patients in 2005 and 2009 by poison type, age and gender
